# Supplementary material
Source: publisher figshare collection journal article supplement (https://tandf.figshare.com/ndownloader/files/21262782)
Supplement: Supplementary file 1 [file 21262782]

**Supplementary Data**

**of**

The geographical effect on the stable isotopic composition of precipitation across Thailand

Jeerapong Laonamsaia*, Kimpei Ichiyanagia, and Kiattipong Kamdeeb

aFaculty of Advanced Science and Technology, Kumamoto University, Kumamoto, Japan;

bThailand Institute of Nuclear Technology, Nakonnayok, Thailand

Manuscript submitted to

Isotopes Environment and Health Studies

Corresponding Author:

Jeerapong Laonamsai, Faculty of Advanced Science and Technology, Kumamoto University, Kurokami 2-39-1, Chuo-ku, Kumamoto City, 860-8555, Kumamoto, Japan. Email: teeyoon100@gmail.com

Table S1 General information of the observation sites; including mean value of δ18O and *d-excess* for each meteorological season.

| General Information | | | | | | DJF (‰) | | | | MAM (‰) | | | | JJA (‰) | | | | SON (‰) | | | |
| --- | --- | --- | --- | --- | --- | --- | --- | --- | --- | --- | --- | --- | --- | --- | --- | --- | --- | --- | --- | --- | --- |
| Sta. | City | Sta-Code | Lat. | Lon. | Alt. | O-18 | Std. | *d-excess* | Std. | O-18 | Std. | *d-excess* | Std. | O-18 | Std. | *d-excess* | Std. | O-18 | Std. | *d-excess* | Std. |
| PKN | Prachuapkirikun | C1 | 12.41 | 99.92 | 21 | -5.21 | 2.04 | 10.13 | 3.08 | -2.70 | 2.46 | 6.51 | 6.77 | -3.59 | 2.35 | 5.91 | 5.43 | -6.80 | 4.39 | 7.52 | 5.66 |
| SKN | Samutsakorn | C2 | 13.52 | 100.15 | 5 | -3.78 | 0.53 | 7.23 | 1.37 | -2.27 | 1.18 | 10.37 | 1.64 | -4.72 | 4.01 | 7.44 | 6.71 | -5.95 | 2.55 | 8.86 | 3.76 |
| BKK | Bangkok | C3 | 13.72 | 100.45 | 6 | -3.04 | 0.83 | 12.48 | 1.79 | -2.57 | 1.28 | 10.65 | 4.67 | -4.08 | 3.83 | 7.27 | 2.43 | -5.36 | 2.55 | 6.09 | 4.66 |
| LOP | Lopburi | C4 | 14.84 | 100.89 | 71 | -2.54 | 1.11 | 9.81 | 2.78 | -2.70 | 2.68 | 6.70 | 5.32 | -4.76 | 2.79 | 6.11 | 5.27 | -6.21 | 3.12 | 5.91 | 5.07 |
| TAT | Trat | E1 | 12.56 | 102.45 | 5 | -2.44 | 0.82 | 10.47 | 3.98 | -2.82 | 1.21 | 8.20 | 4.13 | -4.65 | 2.73 | 9.98 | 5.08 | -5.57 | 3.00 | 9.54 | 4.24 |
| RYG | Rayong | E2 | 12.78 | 101.29 | 11 |  |  |  |  | -3.17 | 2.38 | 10.47 | 1.73 | -3.75 | 2.35 | 9.21 | 4.17 | -6.59 | 2.15 | 8.35 | 2.21 |
| PLK | Phitsanulok | N1 | 16.65 | 100.00 | 238 | -3.07 | 2.82 | 10.55 | 5.94 | -2.40 | 2.07 | 10.50 | 4.90 | -5.81 | 3.18 | 4.51 | 4.62 | -7.14 | 2.32 | 9.69 | 2.86 |
| PNB | Phetchabum | N2 | 16.79 | 101.28 | 194 | -3.42 | 0.76 | 10.13 | 1.56 | -2.60 | 1.53 | 5.00 | 5.03 | -5.12 | 2.13 | 7.03 | 3.07 | -7.22 | 2.44 | 7.10 | 3.57 |
| STI | Sukhothai | N3 | 17.30 | 99.84 | 78 | -2.34 | 1.17 | 11.27 | 3.68 | -2.34 | 2.26 | 8.56 | 4.37 | -5.35 | 2.89 | 6.22 | 2.91 | -6.86 | 1.97 | 9.43 | 2.03 |
| NAN | Nan | N4 | 18.57 | 100.75 | 626 | -2.93 | 2.68 | 11.56 | 0.68 | -1.99 | 1.29 | 7.49 | 5.14 | -5.26 | 3.04 | 6.65 | 3.73 | -7.79 | 1.80 | 6.88 | 2.34 |
| CNX | Chiangmai | N5 | 18.79 | 98.99 | 316 | -3.00 | 0.40 | 12.58 | 1.41 | -1.46 | 2.57 | 6.72 | 5.48 | -4.83 | 3.43 | 5.18 | 4.88 | -7.09 | 2.73 | 8.76 | 3.94 |
| CRI | Chiangrai | N6 | 19.81 | 99.99 | 411 | -2.90 | 1.00 | 12.59 | 2.56 | -0.64 | 1.73 | 7.31 | 4.41 | -5.92 | 2.88 | 7.15 | 2.67 | -7.10 | 2.18 | 10.25 | 2.75 |
| SRN | Surin | NE1 | 14.87 | 103.51 | 122 |  |  |  |  | -2.55 | 2.35 | 5.89 | 3.98 | -5.69 | 2.66 | 8.42 | 3.82 | -6.17 | 2.13 | 11.06 | 2.90 |
| NMA | Nakonratchasima | NE2 | 14.89 | 101.87 | 65 | -0.54 | 0.63 | 8.56 | 4.62 | -2.06 | 0.76 | 6.71 | 5.44 | -4.99 | 2.48 | 9.08 | 5.20 | -5.71 | 1.75 | 6.79 | 4.20 |
| UBN | Ubonratchathani | NE3 | 15.39 | 104.56 | 170 | -1.02 | 0.77 | 6.56 | 8.09 | -2.50 | 3.44 | 5.50 | 5.43 | -5.42 | 2.78 | 10.21 | 4.28 | -5.47 | 0.91 | 9.03 | 2.09 |
| KKN | Khonkaen | NE4 | 16.45 | 102.80 | 173 | -3.04 | 1.14 | 4.78 | 3.13 | -2.42 | 1.66 | 9.24 | 4.32 | -5.21 | 2.60 | 7.67 | 4.30 | -6.44 | 2.27 | 6.75 | 3.56 |
| NPM | Nakonphanom | NE5 | 17.54 | 104.63 | 318 | -1.92 | 1.03 | 8.80 | 2.95 | -2.58 | 3.45 | 9.62 | 5.81 | -6.37 | 2.65 | 9.79 | 4.17 | -8.69 | 2.94 | 10.53 | 2.88 |
| NKI | Nongkhai | NE6 | 18.06 | 103.09 | 180 | -2.34 | 1.49 | 9.37 | 5.04 | -1.41 | 2.23 | 7.18 | 5.15 | -6.35 | 2.68 | 9.31 | 4.53 | -7.21 | 2.23 | 8.88 | 2.19 |
| PTN | Pattani | S1 | 6.80 | 101.13 | 13 | -3.48 | 1.26 | 11.23 | 3.54 | -3.77 | 1.33 | 6.68 | 3.49 | -4.17 | 3.12 | 7.46 | 5.59 | -6.03 | 2.86 | 10.09 | 4.91 |
| STN | Satun | S2 | 6.88 | 99.78 | 8 | -3.46 | 1.37 | 11.18 | 1.73 | -4.17 | 1.57 | 11.58 | 3.68 | -4.82 | 2.71 | 11.30 | 2.87 | -5.97 | 2.86 | 11.72 | 2.32 |
| PLG | Pattalung | S3 | 7.78 | 100.11 | 62 | -3.00 | 0.78 | 13.65 | 2.40 | -3.71 | 1.19 | 9.51 | 3.17 | -4.61 | 2.31 | 9.64 | 2.54 | -6.21 | 2.62 | 11.36 | 3.17 |
| PKT | Phuket | S4 | 7.80 | 98.41 | 35 | -3.03 | 1.36 | 11.64 | 1.56 | -3.56 | 1.77 | 9.18 | 3.64 | -4.40 | 2.22 | 10.55 | 2.59 | -6.30 | 4.15 | 12.53 | 5.42 |
| SNI | Suratthani | S5 | 9.54 | 99.94 | 0 | -3.63 | 0.73 | 13.22 | 1.84 | -2.67 | 1.20 | 8.73 | 3.62 | -4.51 | 2.51 | 10.01 | 4.02 | -5.49 | 2.29 | 10.08 | 3.55 |
| RNG | Ranong | S6 | 10.33 | 98.78 | 6 | -2.70 | 0.56 | 10.29 | 0.98 | -3.46 | 1.54 | 12.21 | 2.47 | -4.04 | 2.30 | 10.63 | 2.70 | -6.62 | 2.59 | 11.17 | 2.75 |
| KRI | Kanchanaburi | W1 | 15.15 | 98.45 | 211 | -3.12 | 0.65 | 9.03 | 4.79 | -2.63 | 1.85 | 8.79 | 4.87 | -4.13 | 2.35 | 8.76 | 5.16 | -4.86 | 3.38 | 3.89 | 5.32 |
| TAK | Tak | W2 | 16.81 | 98.58 | 419 | -4.00 | 0.63 | 12.96 | 2.14 | -3.06 | 2.73 | 9.65 | 8.36 | -5.17 | 2.68 | 7.45 | 3.39 | -6.45 | 2.45 | 7.27 | 3.48 |

Sta-Code is the station code. Lat is latitude (°N). Lon is longitude (°E). Alt is Altitude (m). Std is the standard deviation.





Figure S1. Distribution of δ18O and *d-excess* includes probability and normal distribution during the study period in the sites. Boxes represent the standard deviation; blue box is the peninsular station and white box is the inland station. The average is represented by the rectangular point through the box. Whiskers represent the maximum and minimum value.





Figure S2. Plot of the rainfall δ18O versus (a) precipitation amount and (b) air temperature for the entire period of 2013-2015.
